# Supplementary material for: Abrogation of KLF5 sensitizes BRCA1-proficient pancreatic cancer to PARP inhibition : KLF5 mediates sensitivity to PARP in BRCA1-proficient PDAC
Source: PubMed Central journal article supplement (PMC11090855; doi:10.3724/abbs.2023288), 2024-03-04
Supplement: 23385Supplementary_Table_S1.pdf [file 23385Supplementary_Table_S1.pdf]

**Supplementary Table S1. Sequences of primers used in this study**

| Gene            | Sequence (5'→3')          |
|-----------------|---------------------------|
| RAD51 forward   | CAACCCATTTACGGTTAGAGC     |
| RAD51 reverse   | CAACCCATTTACGGTTAGAGC     |
| BARD1 forward   | CTGCTCGCGTTGTACTAACAT     |
| BARD1 reverse   | TCCAATGCAGTCACTTACACAAT   |
| BRCA1 forward   | GAAACCGTGCCAAAAGACTTC     |
| BRCA1 reverse   | CCAAGGTTAGAGAGTTGGACAC    |
| BRIP1 forward   | GGAAACAGTCAAGAGTCATCGAA   |
| BRIP1 reverse   | TCTGAGCAATCTGCTTGTGTG     |
| RAD54B forward  | GCCAAACACTGATGATTTGTGG    |
| RAD54B reverse  | CCTGAGAAGAATGCGAGATAGC    |
| XRCC2 forward   | TGCTTTATCACCTAACAGCACG    |
| XRCC2 reverse   | TGCTTTATCACCTAACAGCACG    |
| BRCC3 forward   | GAGTCTGACGCTTTCCTCGTT     |
| BRCC3 reverse   | TGTATCATCGTTCAACTCCCCT    |
| RPA1 forward    | CGGGAATGGGTTCTACTGTTTC    |
| RPA1 reverse    | CGAGCACAAATGGTCCACTTG     |
| POLD1 forward   | CGGGGACGAGTTTGTGAAGA      |
| POLD1 reverse   | CGTATACGGAGTTGGCGCTC      |
| RBBP8 forward   | AGATCGGTTAAGAGCAGGCTT     |
| RBBP8 reverse   | TGCTGCCGGATATTTTCAAACCT   |
| POLD3 forward   | ACCAACAAGGAAACGAAAACAGA   |
| POLD3 reverse   | GGTTCCGTGACAGACACTGTA     |
| TOPBP1 forward  | TTCAGCAACTCACAGTTAAGCA    |
| TOPBP1 reverse  | GGCACACTCATACTTCTGACC     |
| RAD51C forward  | TTTGGTGAGTTTCCCGCTGTC     |
| RAD51C reverse  | AACTTCTTTGCTAAGCTCGGAG    |
| β-actin forward | GAGACCTTCAACACCCCAGC      |
| β-actin reverse | GATAGCACAGCCTGGATAGCA     |
| KLF5 forward    | ACACCAGACCGCAGCTCCA       |
| KLF5 reverse    | TCCATTGCTGCTGTCTGATTTGTAG |
| ChIP forward 1  | CAGAAGCAACCTGAACCCGA      |
| ChIP reverse 1  | CACGAGTCTCGGGCAAGTAG      |
| ChIP forward 2  | AAGCAACCTGAACCCGAACA      |
| ChIP reverse 2  | CGAGTCTCGGGCAAGTAGTC      |
| ChIP forward 3  | CCCAAACCCTCTTAGCGTGA      |
| ChIP reverse 3  | AACACTCGGAGAAACAGGGG      |
| ChIP forward 4  | AACCCTCTTAGCGTGACGTG      |
| ChIP reverse 4  | CACTCGGAGAAACAGGGGAC      |
| ChIP forward 5  | GCCCCTCTTCTTTGCAGGAT      |
| ChIP reverse 5  | TTGTTCGGGTTTCAGGTTGC      |

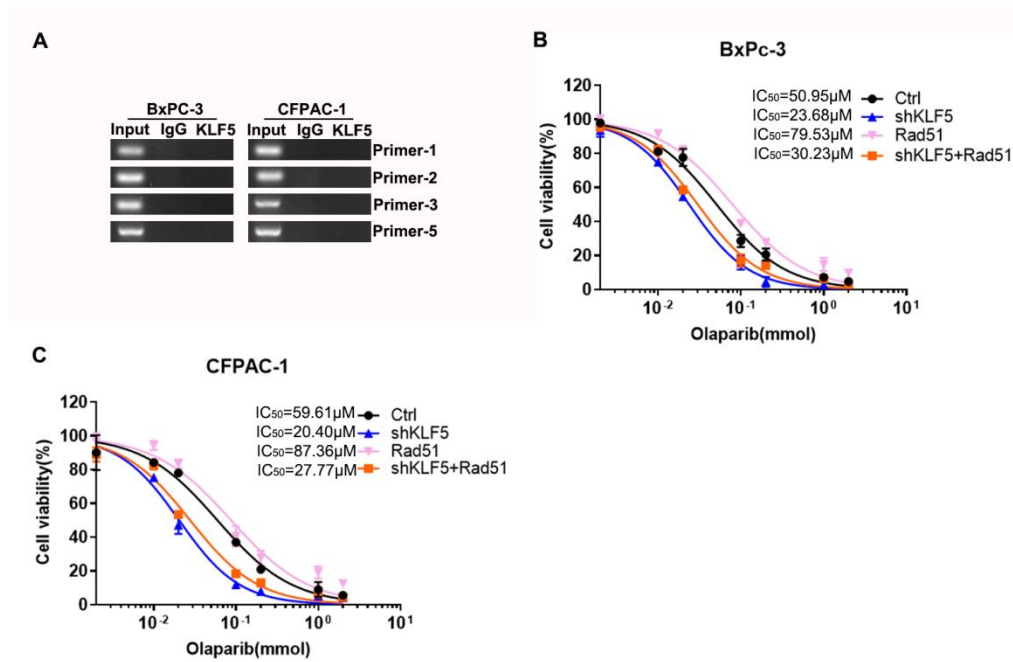

**Supplementary Figure S1. The effects of KLF5 on BRCA1 and Rad51** (A) The binding of KLF5 to 4 predicted sites of the *BRAC1* promoter region in BxPC-3 and CFPAC-1 cells was detected by ChIP assay. (B,C) CCK-8 assay depicted the dose-dependent toxicity of olaparib in BxPC3 and CFPAC-1 cell lines transfected with shKLF5 and Rad51.
